# Supplementary material for: An electrochemically aminated glassy carbon electrode for simultaneous determination of hydroquinone and catechol
Source: Royal Society of Chemistry journal article supplement (doi:10.1039/c5an02098k), 2015-11-16
Supplement: c5an02098k1.pdf [file c5an02098k1.pdf]

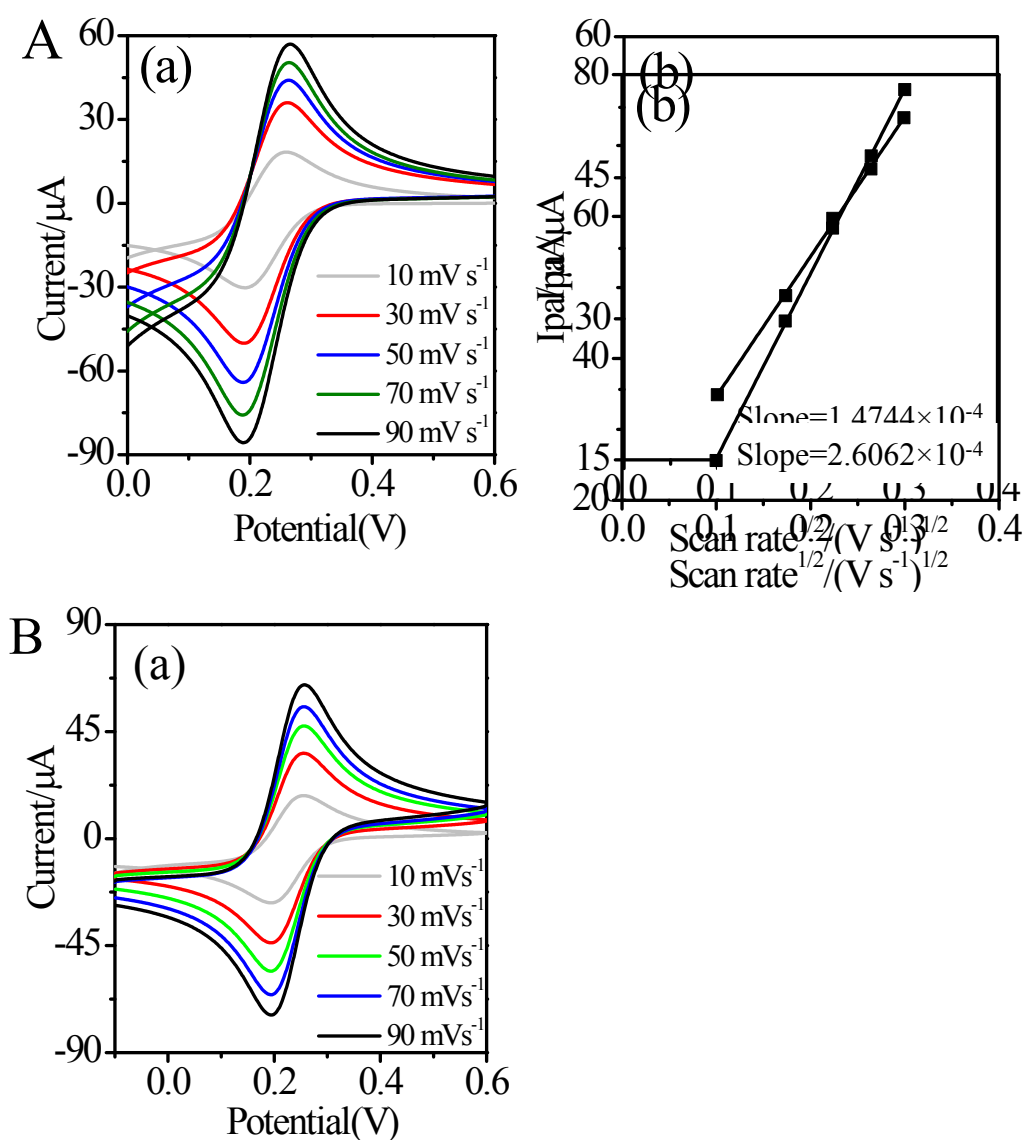

Fig. S1 CVs of GCE (A) and N-GCE (B) using 5.0 mM  $\text{Fe}(\text{CN})_6^{4-/3-}$  as a probe in 0.1 M KCl at different scan rates from inner to outer: 10, 30, 50, 70, 90 ( $\text{mV s}^{-1}$ ) (a) and the corresponding linear relationship between anodic peak current and square root of scan rate (b).

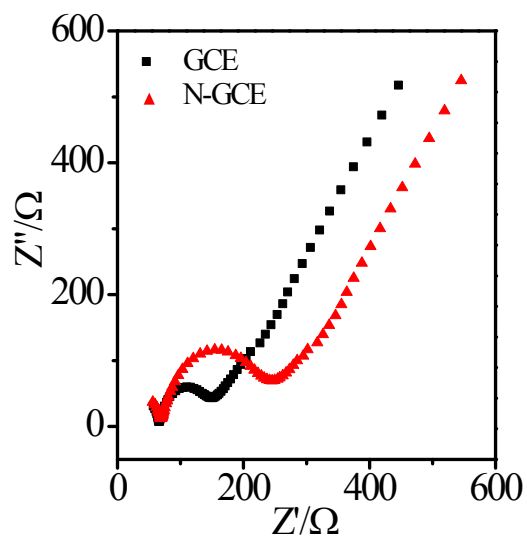

Fig. S2 Nyquist plots of GCE and N-GCE in 0.1 M KCl solution using 5 mM  $[\text{Fe}(\text{CN})_6]^{3-/4-}$  as a probe.

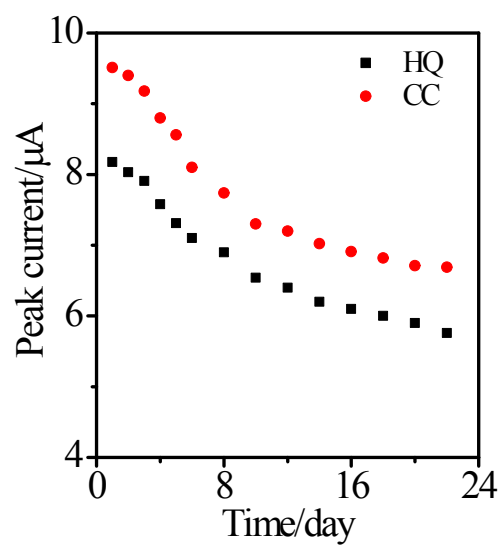

Fig. S3 Time dependence of current response of N-GCE to a mixture of 300  $\mu\text{M}$  HQ and 300  $\mu\text{M}$  CC in PBS (0.1M, pH 7.0). N-GCE was stored in PBS (0.1M, pH 7.0) at room temperature when it was not in use.

Table.S1 Influence of some possible interfering substances on the simultaneous determination of 300  $\mu\text{M}$  HQ and 30  $\mu\text{M}$  CC (n=5)

| Coexisting substances         | Concentration/M      | Relative error/% |
|-------------------------------|----------------------|------------------|
| Na <sup>+</sup>               | $3.0 \times 10^{-2}$ | 1.22             |
| K <sup>+</sup>                | $3.0 \times 10^{-2}$ | 1.03             |
| Ca <sup>2+</sup>              | $3.0 \times 10^{-2}$ | 1.10             |
| Mg <sup>2+</sup>              | $3.0 \times 10^{-2}$ | 1.05             |
| Fe <sup>2+</sup>              | $3.0 \times 10^{-2}$ | 2.04             |
| NO <sub>3</sub> <sup>-</sup>  | $3.0 \times 10^{-2}$ | 2.05             |
| SO <sub>4</sub> <sup>2-</sup> | $3.0 \times 10^{-2}$ | 2.12             |
| Cl <sup>-</sup>               | $3.0 \times 10^{-2}$ | 2.30             |
| Resorcinol                    | $3.0 \times 10^{-4}$ | 4.54             |
| Phenol                        | $3.0 \times 10^{-4}$ | 3.02             |
| Hydroxybenzoic acid           | $3.0 \times 10^{-4}$ | 3.41             |
| Hydroxy benzaldehyde          | $3.0 \times 10^{-4}$ | 1.56             |
| Hydroxybenzyl alcohol         | $3.0 \times 10^{-4}$ | 2.04             |
| Acetaminophen                 | $3.0 \times 10^{-4}$ | 3.26             |
| Ascorbic acid                 | $3.0 \times 10^{-4}$ | 4.25             |
| Uric acid                     | $3.0 \times 10^{-4}$ | 1.45             |
